# Supplementary material for: Risk and Protective Factors for Executive Function in Vulnerable South African Preschool-Age Children
Source: PubMed Central journal article supplement (PMC11259110; doi:10.5334/joc.377), 2024-07-18
Supplement: joc-7-1-377-s1.pdf [file joc-7-1-377-s1.pdf]

**Table S1:** Bivariate correlations between variables of interest

| Variables                         | (1)    | (2)    | (3)    | (4)    | (5)    | (6)    | (7)    | (8)    | (9)    | (10)   | (11)   | (12)  | (13)  | (14)  | (15) |
|-----------------------------------|--------|--------|--------|--------|--------|--------|--------|--------|--------|--------|--------|-------|-------|-------|------|
| (1) EF composite score            | 1.00   |        |        |        |        |        |        |        |        |        |        |       |       |       |      |
| (2) Child age                     | 0.471  | 1.00   |        |        |        |        |        |        |        |        |        |       |       |       |      |
| (3) Child attending ECCE          | 0.445  | 0.379  | 1.00   |        |        |        |        |        |        |        |        |       |       |       |      |
| (4) Household income range        | 0.093  | 0.021  | 0.080  | 1.00   |        |        |        |        |        |        |        |       |       |       |      |
| (5) Household asset score         | 0.116  | -0.023 | 0.233  | 0.343  | 1.00   |        |        |        |        |        |        |       |       |       |      |
| (6) # children in the house       | -0.048 | 0.085  | -0.053 | 0.206  | 0.006  | 1.00   |        |        |        |        |        |       |       |       |      |
| (7) # languages spoken in home    | 0.046  | 0.072  | -0.068 | -0.018 | 0.049  | 0.110  | 1.00   |        |        |        |        |       |       |       |      |
| (8) Caregiver education           | 0.025  | -0.038 | 0.205  | 0.168  | 0.271  | -0.155 | -0.071 | 1.00   |        |        |        |       |       |       |      |
| (9) CECV total score              | -0.045 | 0.170  | -0.097 | -0.006 | -0.168 | 0.017  | 0.120  | -0.115 | 1.00   |        |        |       |       |       |      |
| (10) Caregiver-child relationship | -0.103 | -0.011 | -0.200 | -0.237 | -0.193 | 0.126  | 0.159  | -0.228 | -0.060 | 1.00   |        |       |       |       |      |
| (11) Family relationship score    | -0.191 | -0.144 | -0.253 | -0.057 | -0.175 | -0.026 | 0.111  | -0.110 | 0.197  | 0.204  | 1.00   |       |       |       |      |
| (12) HLA frequency score          | 0.068  | 0.124  | 0.172  | 0.088  | 0.163  | 0.135  | 0.214  | -0.049 | 0.075  | -0.227 | 0.087  | 1.00  |       |       |      |
| (13) Diversity of caregivers      | 0.181  | 0.104  | 0.110  | 0.183  | 0.215  | 0.102  | 0.266  | 0.110  | 0.064  | -0.239 | -0.121 | 0.480 | 1.00  |       |      |
| (14) Books and toys in home       | -0.103 | 0.072  | 0.040  | 0.150  | 0.207  | -0.004 | 0.140  | 0.122  | 0.149  | -0.145 | -0.046 | 0.335 | 0.249 | 1.00  |      |
| (15) Time with child              | 0.045  | 0.149  | 0.146  | 0.109  | 0.039  | 0.004  | 0.157  | -0.014 | 0.140  | -0.389 | -0.224 | 0.239 | 0.277 | 0.359 | 1.00 |
